# Supplementary material
Source: HighWire-hosted journal article supplement (http://jpet.aspetjournals.org/highwire/filestream/145973/field_highwire_adjunct_files/0/262048SupplFigure.pdf)

**Impaired endothelium-dependent hyperpolarization underlies  
endothelial dysfunction during early metabolic challenge: Increased  
ROS generation and possible interference with NO function**

Rana Alaaeddine, Mohammed A.W. Elkhatib, Ali Mroueh, Hosny Fouad, Evan I. Saad, Marwan E. El-Sabban, Frances Plane, and Ahmed F. El-Yazbi

Journal of Pharmacology and Experimental Therapeutics

Supplementary Figure 1. ACh-mediated relaxation in aortic rings from control and HC-fed rats after pre-constriction with equi-effective concentrations of PE (A, five rats) or 0.1  $\mu$ M U46619 (B, four rats). Statistical significance was assessed by two-way ANOVA. \* denotes  $P < 0.05$  vs. the corresponding value in control rats.

Supplementary Figure 1

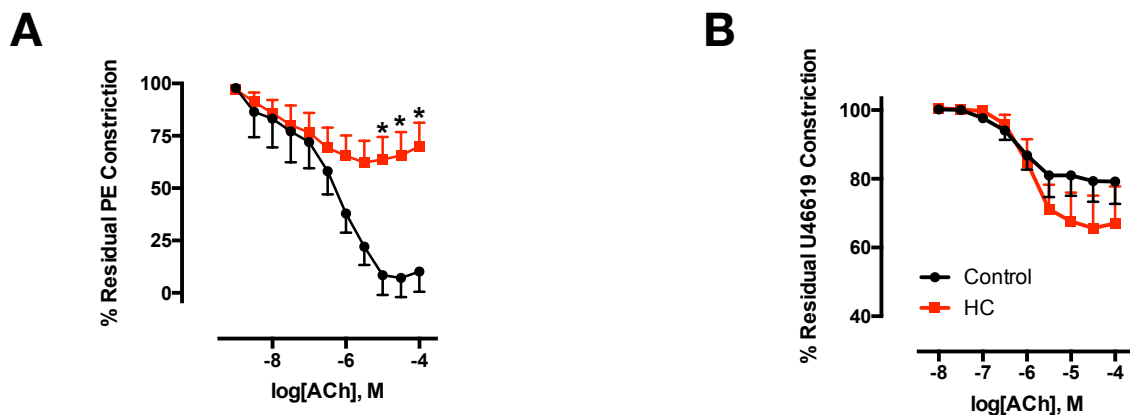

Supplement: 262048SupplFigure.pdf [file 262048SupplFigure.pdf]
